# Supplementary material for: Biphasic regulation of chondrocytes by Rela through induction of anti-apoptotic and catabolic target genes
Source: PubMed Central journal article supplement (PMC5109547; doi:10.1038/ncomms13336), 2016-11-10
Supplement: ncomms13336-s1.pdf [file ncomms13336-s1.pdf]

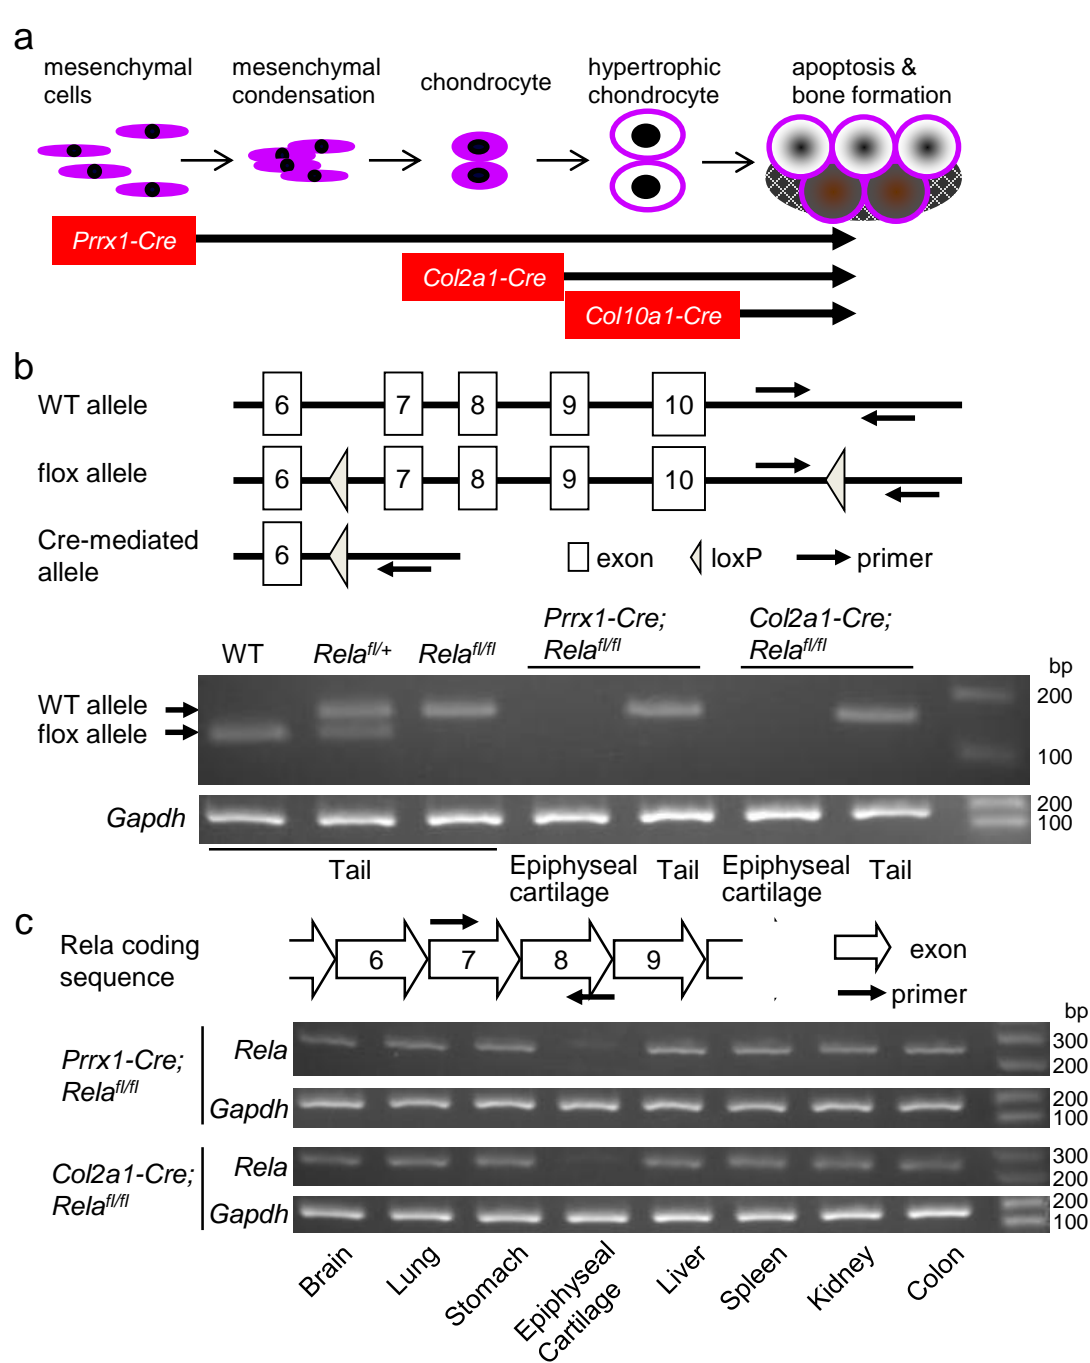

### Supplementary Figure 1

Cre mice used for *in vivo* analyses of *Rela* during skeletal development. **(a)** Scheme of Cre expression in the three mouse strains during chondrocyte generation and endochondral ossification. **(b)** Genotyping of *Rela*-flox mice. A primer set for genotyping was designed to detect the latter loxP site. WT or floxed alleles were not detected in genomic samples obtained from epiphyseal cartilage of *Prrx1-Cre;Rela*<sup>fl/fl</sup> and *Col2a1-Cre;Rela*<sup>fl/fl</sup> mice, indicating tissue-specific recombination in both mouse lines. **(c)** RT-PCR analysis of *Rela* using mRNA samples obtained from various tissues of *Prrx1-Cre;Rela*<sup>fl/fl</sup> and *Col2a1-Cre;Rela*<sup>fl/fl</sup> mice, indicating tissue-specific knockdown of *Rela* in both mouse lines.

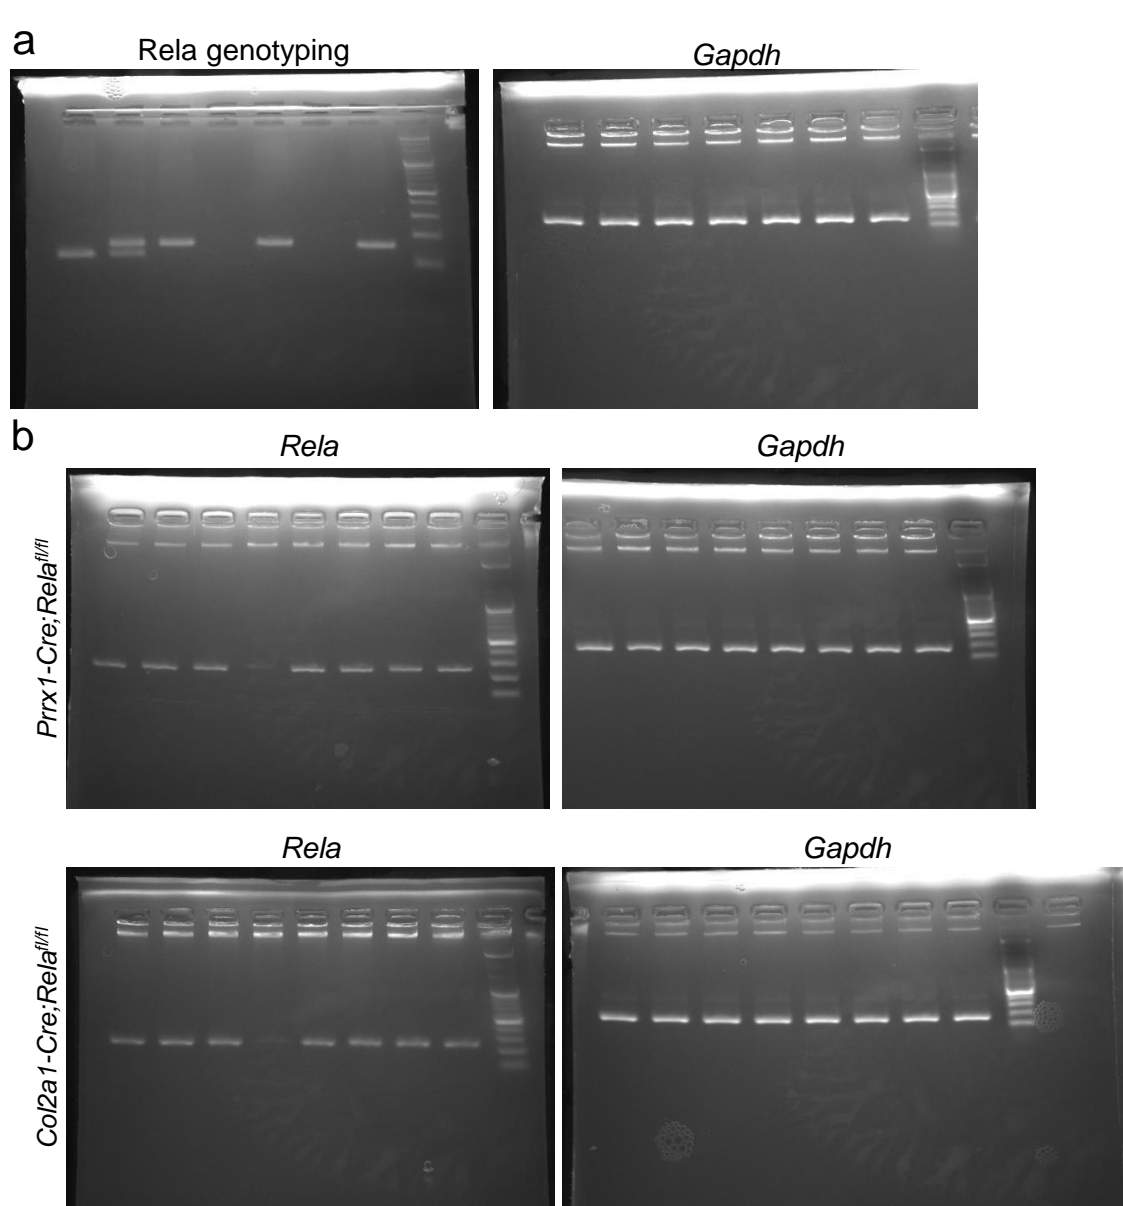

**Supplementary Figure 2**

Original images of the agarose gel electrophoresis shown in Supplementary Fig.1b, and c.

(a) Original images of Supplementary Fig.1b. (b) Original images of Supplementary Fig.1c.

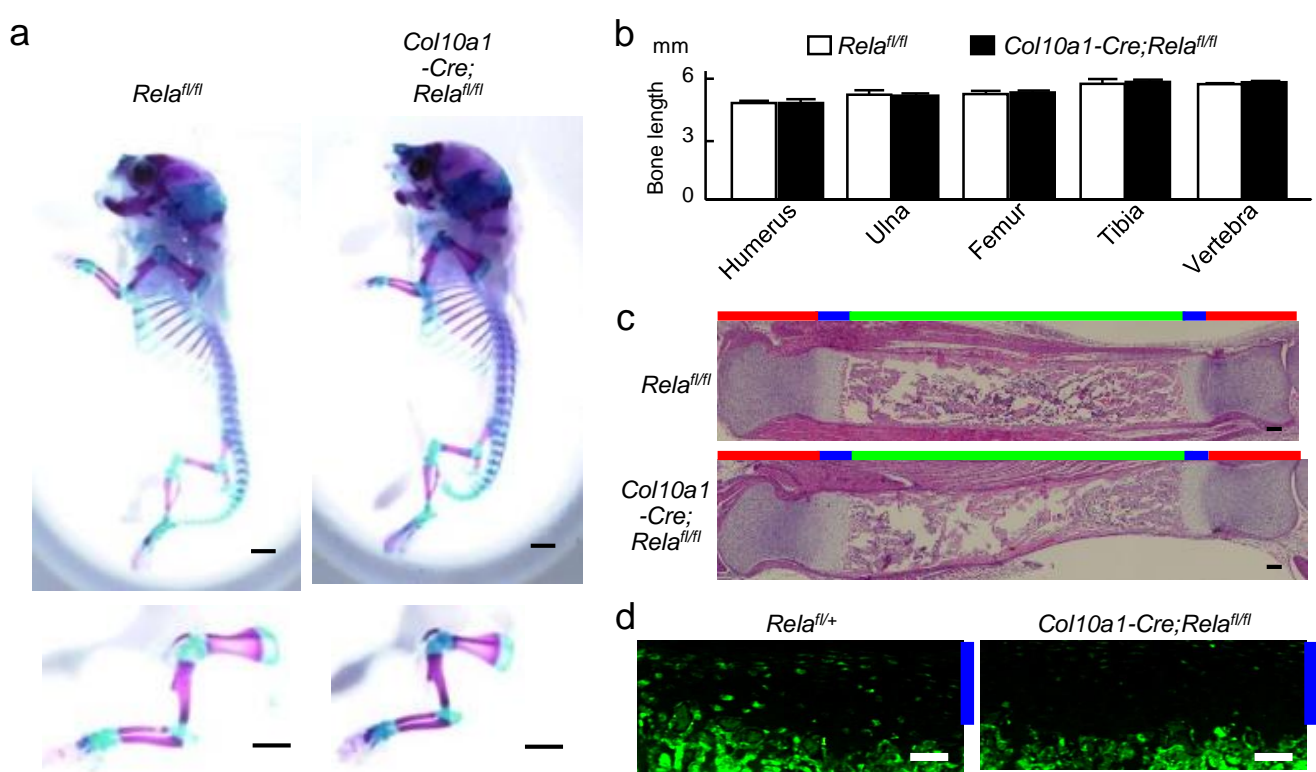

### Supplementary Figure 3

Skeletal development of *Col10a1-Cre;Rela<sup>fl/fl</sup>* mice. **(a)** Double staining with Alizarin red and Alcian blue of the whole skeleton (left) and upper extremities (right) of *Rela<sup>fl/fl</sup>* and *Col10a1-Cre;Rela<sup>fl/fl</sup>* littermate embryos (E18.5). Scale bars, 1 mm. **(b)** Length of long bones and vertebrae (first to fifth lumbar spines) of *Rela<sup>fl/fl</sup>* and *Col10a1-Cre;Rela<sup>fl/fl</sup>* littermate embryos (E18.5). Data are expressed as the means  $\pm$  s.d. of five mice per group. **(c)** H&E staining of whole tibias of *Rela<sup>fl/fl</sup>* and *Col10a1-Cre;Rela<sup>fl/fl</sup>* littermate embryos (E18.5). Scale bars, 100  $\mu$ m. Upper bars indicate lengths of the proliferative zone (red), hypertrophic zone (blue), and bone area (green). **(d)** Immunofluorescence of *Rela* in the proximal tibia of *Rela<sup>fl/fl</sup>* and *Col10a1-Cre;Rela<sup>fl/fl</sup>* littermate embryos (E18.5). Right blue bars indicate the hypertrophic zone. Scale bars, 50  $\mu$ m.

*Rela<sup>fl/fl</sup>*

*Col2a1-Cre<sup>ERT</sup>;  
Rela<sup>fl/fl</sup>*

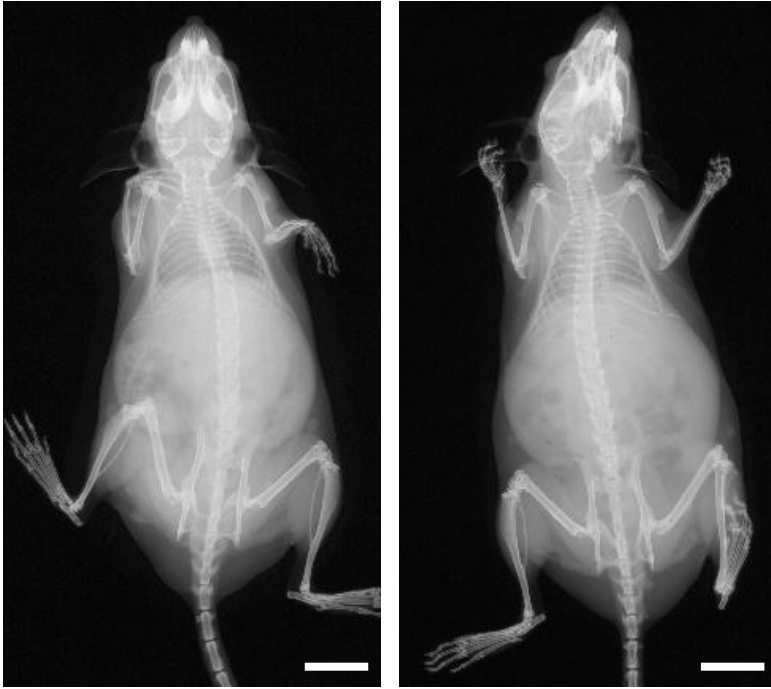

**Supplementary Figure 4**

Skeletal development of *Col2a1-Cre<sup>ERT</sup>;**Rela<sup>fl/fl</sup>* mice. Plain radiograph of *Rela<sup>fl/fl</sup>* and *Col2a1-Cre<sup>ERT</sup>;**Rela<sup>fl/fl</sup>* littermates (7 weeks old, without tamoxifen induction). Scale bars, 10 mm.

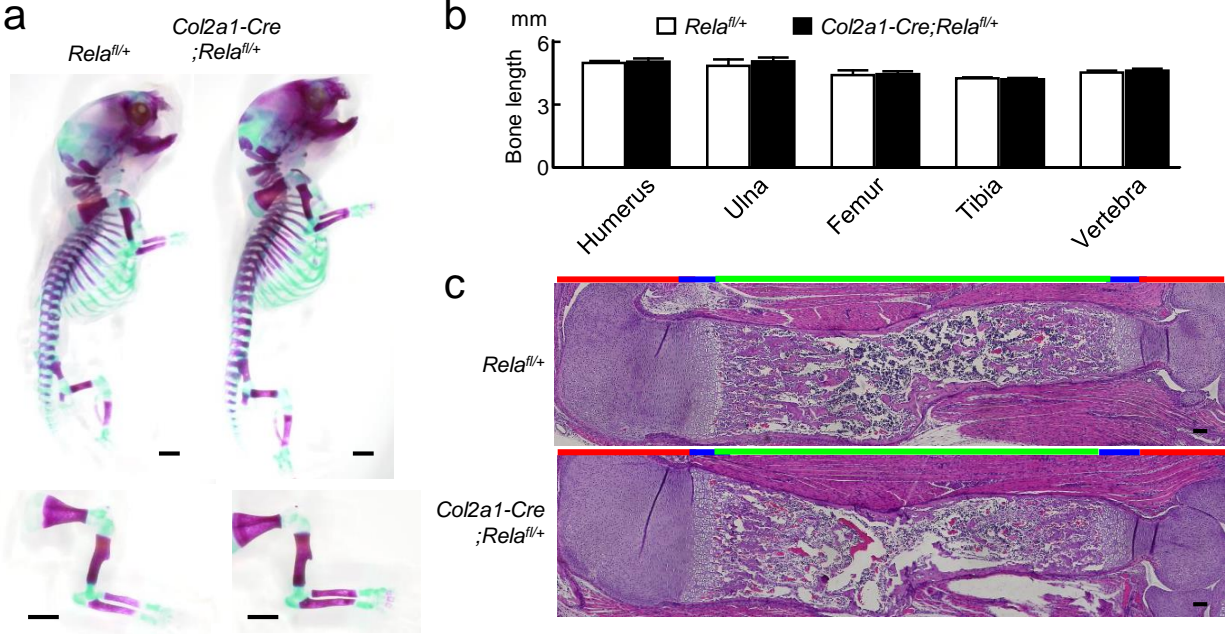

**Supplementary Figure 5**

Skeletal development of *Col2a1-Cre;Rela<sup>fl/+</sup>* mice. **(a)** Double staining with Alizarin red and Alcian blue of the whole skeleton (top) and upper extremities (bottom) of *Rela<sup>fl/+</sup>* and *Col2a1-Cre;Rela<sup>fl/+</sup>* littermate embryos (E18.5). Scale bars, 1 mm. **(b)** Length of long bones and vertebrae (first to fifth lumbar spines) of *Rela<sup>fl/+</sup>* and *Col2a1-Cre;Rela<sup>fl/+</sup>* littermate embryos (E18.5). Data are expressed as the means  $\pm$  s.d. of three *Rela<sup>fl/+</sup>* mice and five *Col2a1-Cre;Rela<sup>fl/+</sup>* mice. **(c)** H&E staining of whole tibias of *Rela<sup>fl/+</sup>* and *Col2a1-Cre;Rela<sup>fl/+</sup>* littermate embryos (E18.5). Scale bars, 100  $\mu$ m. Upper bars indicate lengths of the proliferative zone (red), hypertrophic zone (blue), and bone area (green).

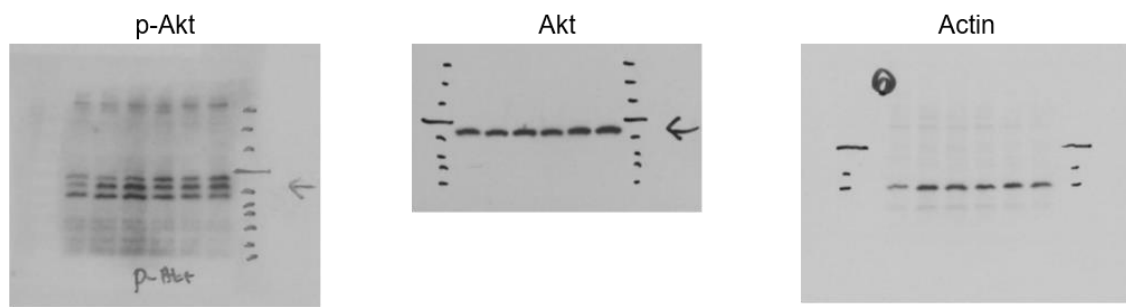

**Supplementary Figure 6**

Original images of the immunoblots shown in Fig. 5d.

N-1

N-2

NC

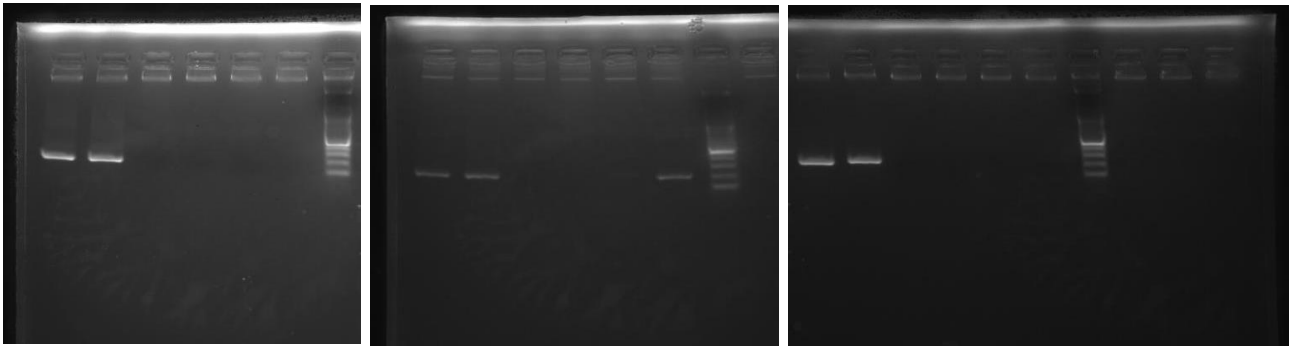

**Supplementary Figure 7**

Original images of the agarose gel electrophoresis of ChIP-PCR shown in Fig. 6e.

**Supplementary Table 1.** Primers used for genotyping.

|              |   |                         |
|--------------|---|-------------------------|
| <i>Rela</i>  | F | gaagctggtctgccaagaac    |
|              | R | catcaaagtcagccaggtca    |
| <i>Cre</i>   | F | gcggtctggcagtaaaaactatc |
|              | R | gtgaaacagcattgctgtcactt |
| <i>Gapdh</i> | F | tgcaccaccaactgcttagc    |
|              | R | accctaaaaggacacctaca    |



**Supplementary Table 2.** Primers used for real-time RT-PCR.

|                |   |                      |
|----------------|---|----------------------|
| <i>Rela</i>    | F | aggtgtatttcacgggacca |
|                | R | cataggtcctttgcgcttc  |
| <i>Col2a1</i>  | F | gccaaacctgaaactctgc  |
|                | R | gccatagctgaagtggaagc |
| <i>Acan</i>    | F | caaaccagcctgacaactt  |
|                | R | tctagcatgctccaccactg |
| <i>Sox9</i>    | F | cgactacgctgaccatcaga |
|                | R | agactggttgttcccagtgc |
| <i>Cdkn1c</i>  | F | aggagcaggacgagaatcaa |
|                | R | acgtttggagagggacacc  |
| <i>Ccnd1</i>   | F | agtgcgtgcagaaggagatt |
|                | R | cacaacttctcggcagtcaa |
| <i>Traf2</i>   | F | gccagattttgagcagaag  |
|                | R | ccagctgttcaccttgta   |
| <i>Cflar</i>   | F | acagagtgaggcggttgac  |
|                | R | ccttggtatcttgcctctg  |
| <i>Birc2</i>   | F | gtcagaatcaaaggccaag  |
|                | R | caccaggctcctactgaagc |
| <i>Pik3ca</i>  | F | actgttcagagaggccagga |
|                | R | cggttgctactggttcaat  |
| <i>Birc3</i>   | F | ggggacagtctgttgaaa   |
|                | R | ggctagagcacaggttgag  |
| <i>Map3k14</i> | F | caaatcctctctgcctcag  |
|                | R | tgttcgccattgagagactg |
| <i>Pik3r1</i>  | F | agccgccagctctgataata |
|                | R | tctcccagtaccattcagc  |
| <i>Ikbkg</i>   | F | ggtggagagactgagcttgg |
|                | R | ctaaagcttgccgatccttg |
| <i>Ppp3cc</i>  | F | gaaccaagcaactggcttc  |
|                | R | tccaacaaaaggcaaagacc |
| <i>Adamts5</i> | F | gctactgcacaggaagagg  |
|                | R | tgcatatttgggaaccatt  |
| <i>Hif2a</i>   | F | tgagttggctcatgagttgc |
|                | R | ctcacggatctcctcatggt |
| <i>Actb</i>    | F | agatgtggatcagcaagcag |
|                | R | gcgcaagttaggtttgtca  |
| <i>Gapdh</i>   | F | tgaccaccaactgcttagc  |
|                | R | ggatgcagggatgatgttct |

**Supplementary Table 3.** Primers used for ChIP-PCR

|     |   |                      |
|-----|---|----------------------|
| N-1 | F | ctccggttcaccctttcac  |
|     | R | accccaggcttttcgag    |
| N-2 | F | ggacgtgtagagccagagca |
|     | R | gagcccacaccaaccaga   |
| NC  | F | aggctagctgtcggagacg  |
|     | R | tgccagtgacaggaagagag |
